# Supplementary material for: Understanding and improving photoelectrochemical performance of Bi2O3/Bi2S3 composite
Source: Royal Society of Chemistry journal article supplement (doi:10.1039/c9nj02913c), 2019-01-01
Supplement: c9nj02913c1.pdf [file c9nj02913c1.pdf]

## Electronic Supplementary Information (ESI)

# Understanding and improving photoelectrochemical performance of Bi<sub>2</sub>O<sub>3</sub>/Bi<sub>2</sub>S<sub>3</sub> composite

*Ji Hyeon Kim,<sup>a</sup> Taewan Lim,<sup>a</sup> Joon Yong Park,<sup>a</sup> Ahyeon Ma,<sup>a</sup> Haeun Jung,<sup>a</sup> Ha Young Kim,<sup>a</sup>  
Sung Ki Cho<sup>b,\*</sup> Hana Yoon,<sup>c</sup> and Ki Min Nam<sup>a,\*</sup>*

<sup>a</sup> Department of Chemistry and Chemistry Institute for Functional Materials, Pusan National University, Busan 46241, Republic of Korea.

<sup>b</sup> Department of Chemical Engineering, Kumoh National Institute of Technology, 61 Daehak-ro, Gumi-si, Gyeongsangbuk-do 39177, Republic of Korea.

<sup>c</sup> Korea Institute of Energy Research (KIER), Daejeon 34129, Republic of Korea.

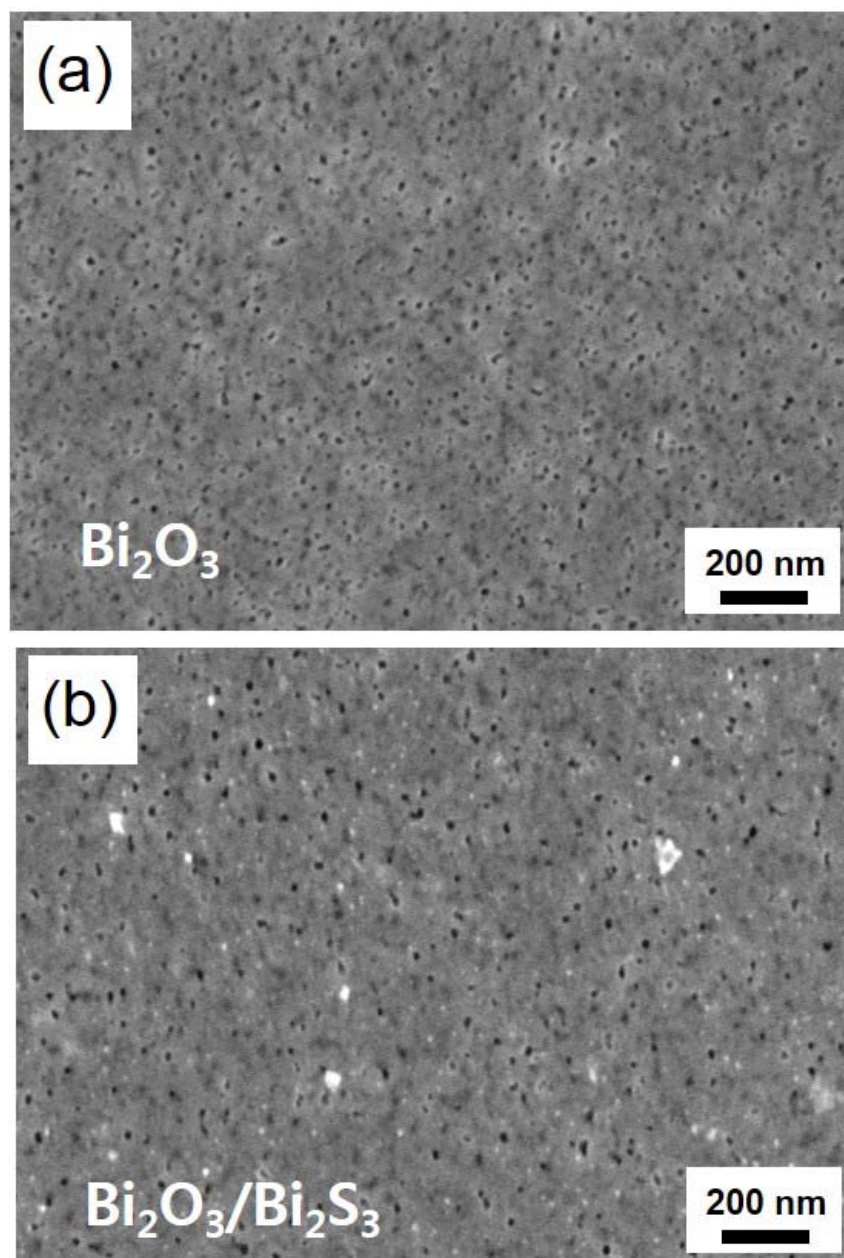

**Fig. S1** SEM images of (a)  $\text{Bi}_2\text{O}_3$ , and (b)  $\text{Bi}_2\text{O}_3/\text{Bi}_2\text{S}_3$  composite films on the FTO substrate.

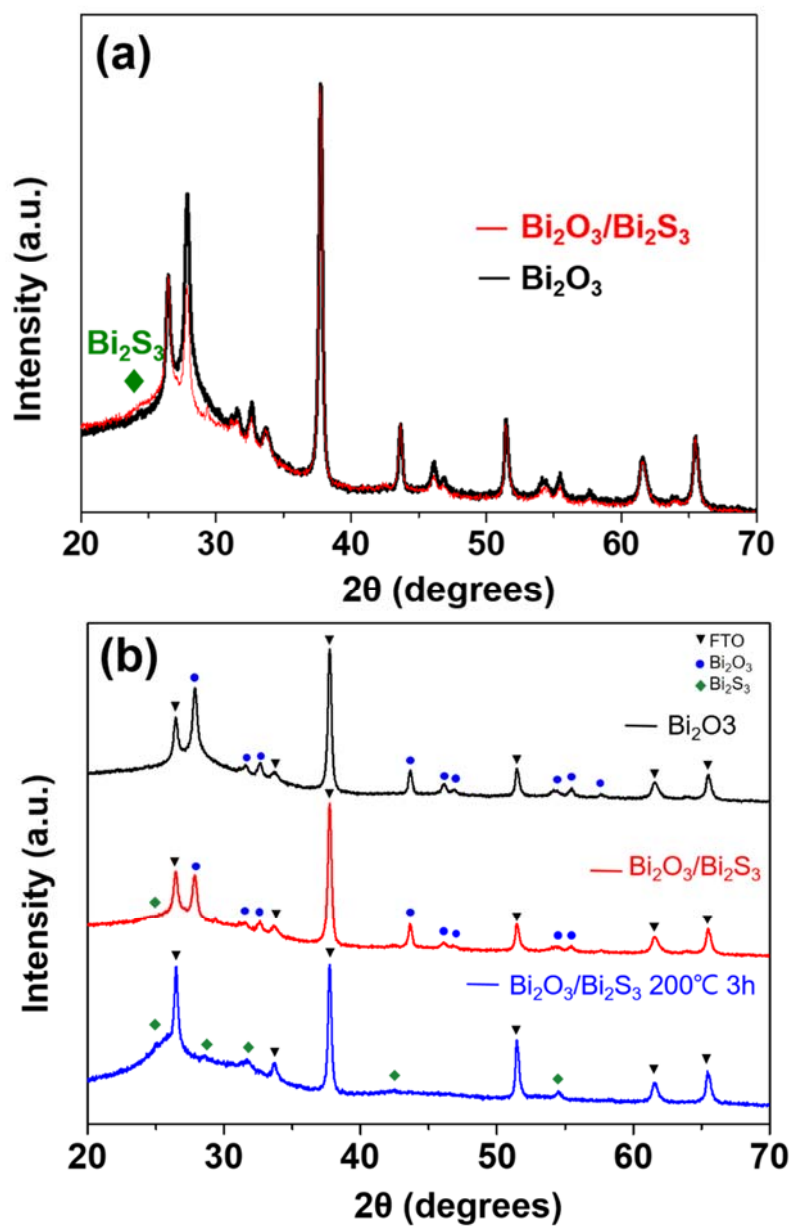

**Fig. S2** (a) XRD patterns of  $\text{Bi}_2\text{O}_3/\text{Bi}_2\text{S}_3$  (red line), and  $\text{Bi}_2\text{O}_3$  (black line) films on the FTO substrate. (b) XRD patterns of  $\text{Bi}_2\text{O}_3$  (black line),  $\text{Bi}_2\text{O}_3/\text{Bi}_2\text{S}_3$  before (red line) and after (blue line) annealing process at  $200^\circ\text{C}$  for 3h in air.

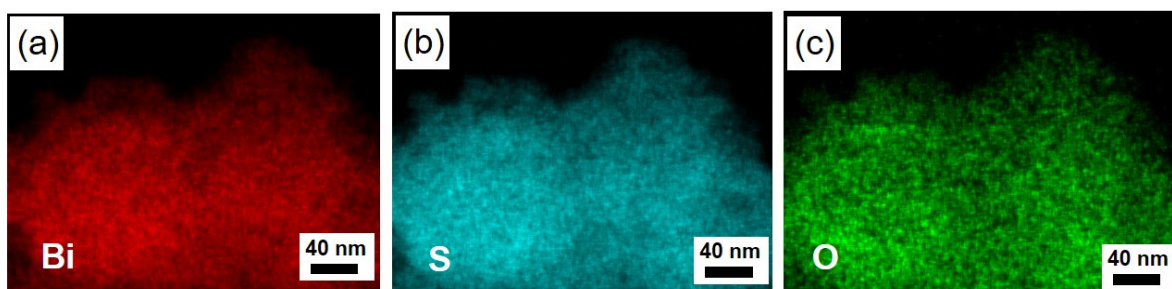

**Fig. S3** Element distribution maps of (a) Bi, (b) S, and (c) O on the  $\text{Bi}_2\text{O}_3/\text{Bi}_2\text{S}_3(\text{Sono})$  composite.

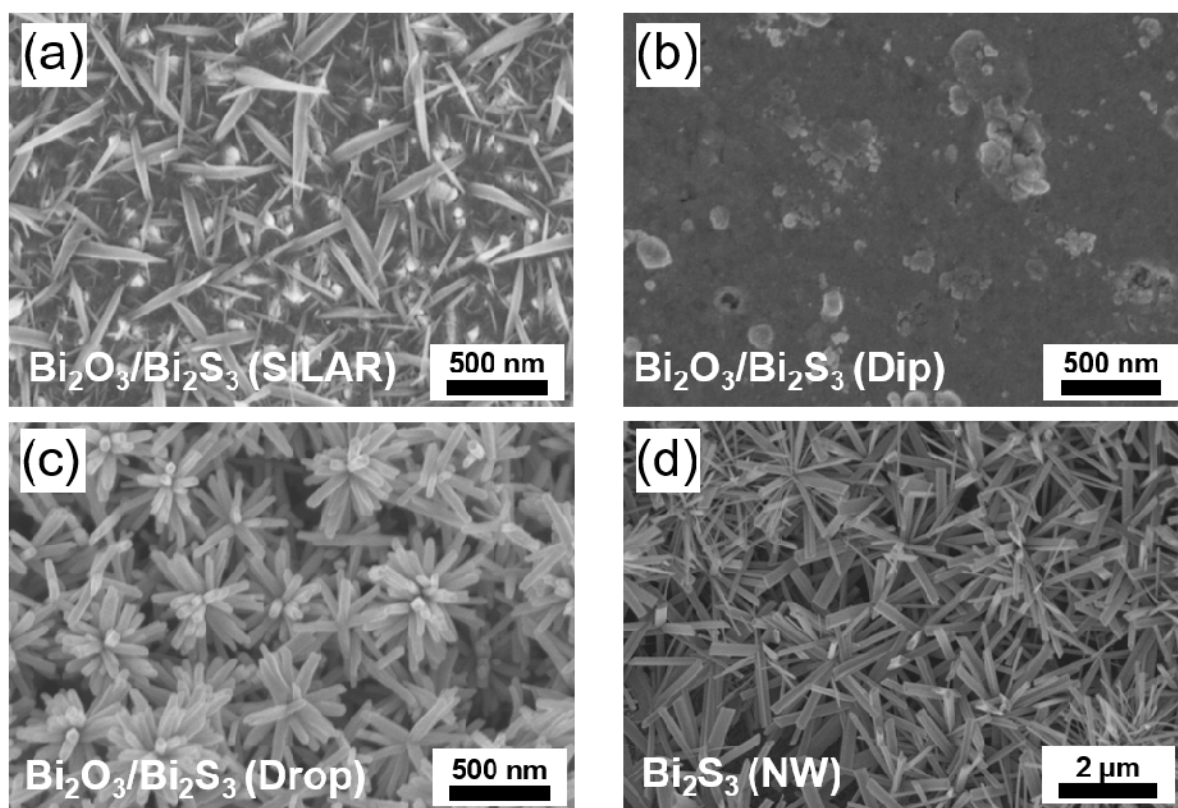

**Fig. S4** SEM images of (a)  $\text{Bi}_2\text{O}_3/\text{Bi}_2\text{S}_3$ (SILAR), (b)  $\text{Bi}_2\text{O}_3/\text{Bi}_2\text{S}_3$ (Dip), (c)  $\text{Bi}_2\text{O}_3/\text{Bi}_2\text{S}_3$ (drop), and (d)  $\text{Bi}_2\text{S}_3$ NW.

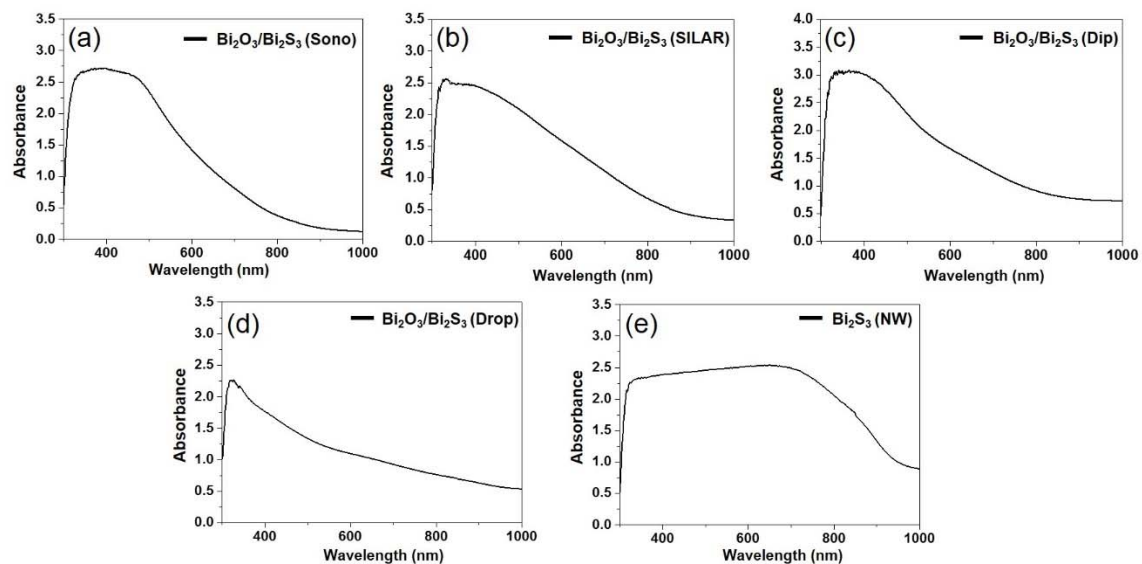

**Fig. S5** UV-visible absorption spectrums of (a)  $\text{Bi}_2\text{O}_3/\text{Bi}_2\text{S}_3$ (Sono), (b)  $\text{Bi}_2\text{O}_3/\text{Bi}_2\text{S}_3$ (SILAR), (c)  $\text{Bi}_2\text{O}_3/\text{Bi}_2\text{S}_3$ (Dip), (d)  $\text{Bi}_2\text{O}_3/\text{Bi}_2\text{S}_3$ (drop), and (e)  $\text{Bi}_2\text{S}_3$ NW.

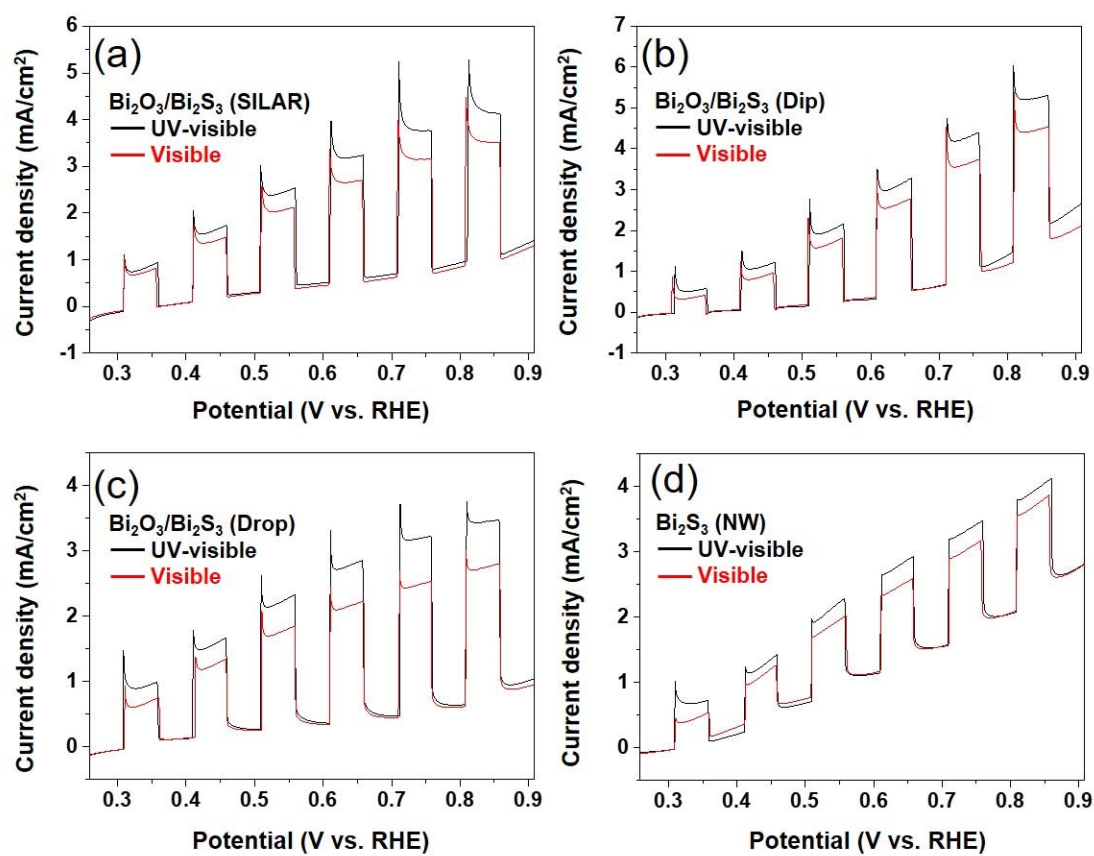

**Fig. S6** LSVs of (a) Bi<sub>2</sub>O<sub>3</sub>/Bi<sub>2</sub>S<sub>3</sub>(SILAR), (b) Bi<sub>2</sub>O<sub>3</sub>/Bi<sub>2</sub>S<sub>3</sub>(Dip), (c) Bi<sub>2</sub>O<sub>3</sub>/Bi<sub>2</sub>S<sub>3</sub>(drop), and (d) Bi<sub>2</sub>S<sub>3</sub>NW electrodes under UV-visible illumination and visible illumination (> 425 nm) in a 0.1 M Na<sub>2</sub>SO<sub>3</sub> and 0.1 M Na<sub>2</sub>S solution. Scan rate: 20 mV/s. Light intensity: 100 mW/cm<sup>2</sup>.

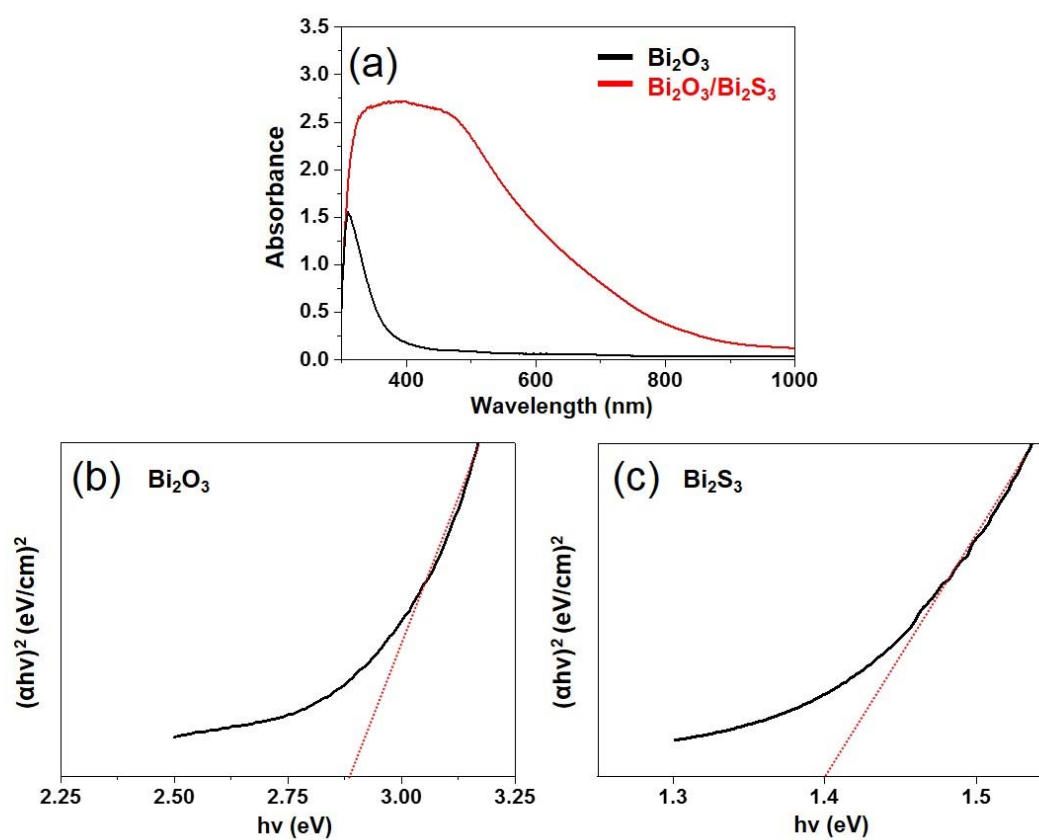

**Fig. S7** (a) UV-visible absorption spectra of  $\text{Bi}_2\text{O}_3/\text{Bi}_2\text{S}_3$  (red line), and  $\text{Bi}_2\text{O}_3$  (black line) films. Tauc plots of (b)  $\text{Bi}_2\text{O}_3$ , and (c)  $\text{Bi}_2\text{O}_3/\text{Bi}_2\text{S}_3$  electrodes.

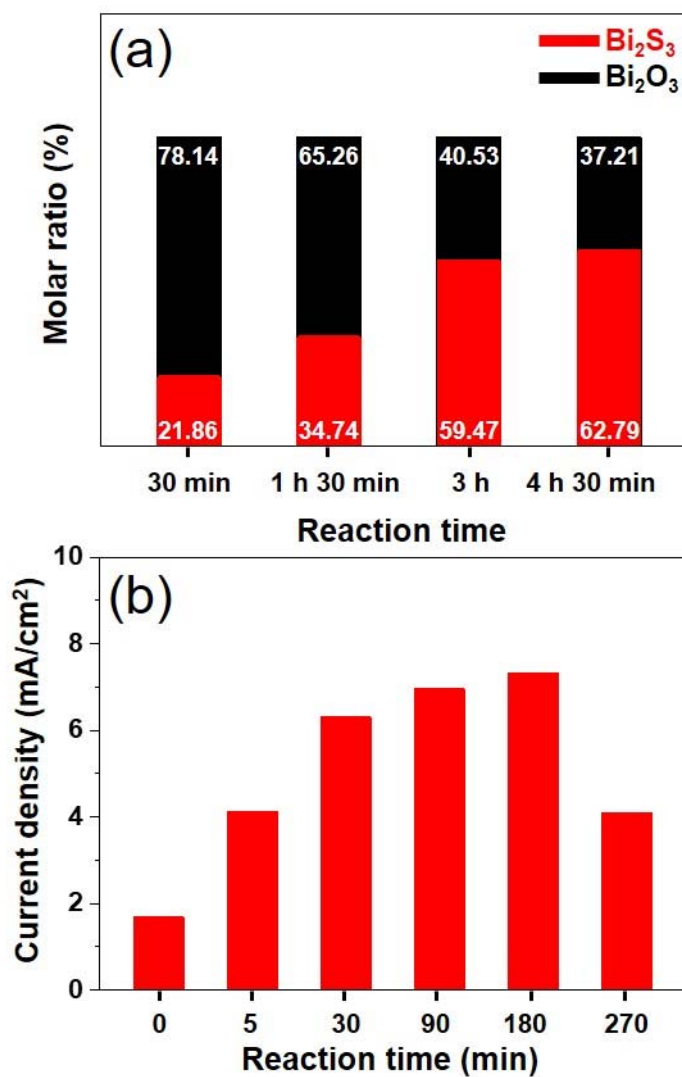

**Fig. S8** (a) The  $\text{Bi}_2\text{S}_3$  to  $\text{Bi}_2\text{O}_3$  molar ratios measured by the energy-dispersive X-ray (EDX) spectroscopy. (b) Photocurrent density as a function of film thickness and reaction period ( $\text{Bi}_2\text{S}_3$  loading amount) at 0.75V vs. RHE.

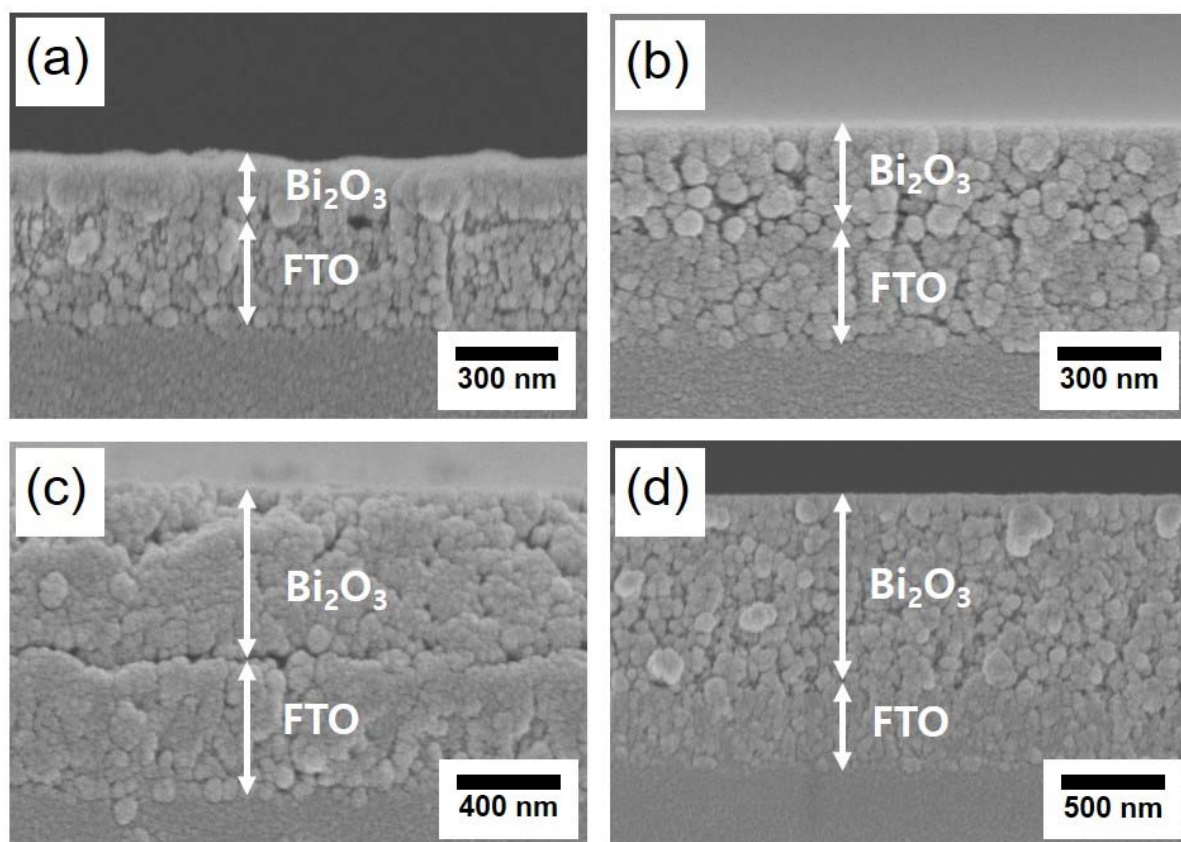

**Fig. S9** SEM cross-section images of the  $\text{Bi}_2\text{O}_3/\text{Bi}_2\text{S}_3(\text{Sono})$  composites depending on the precursor concentrations of (a) 10, (b) 20, (c) 30, and (d) 40 mM.

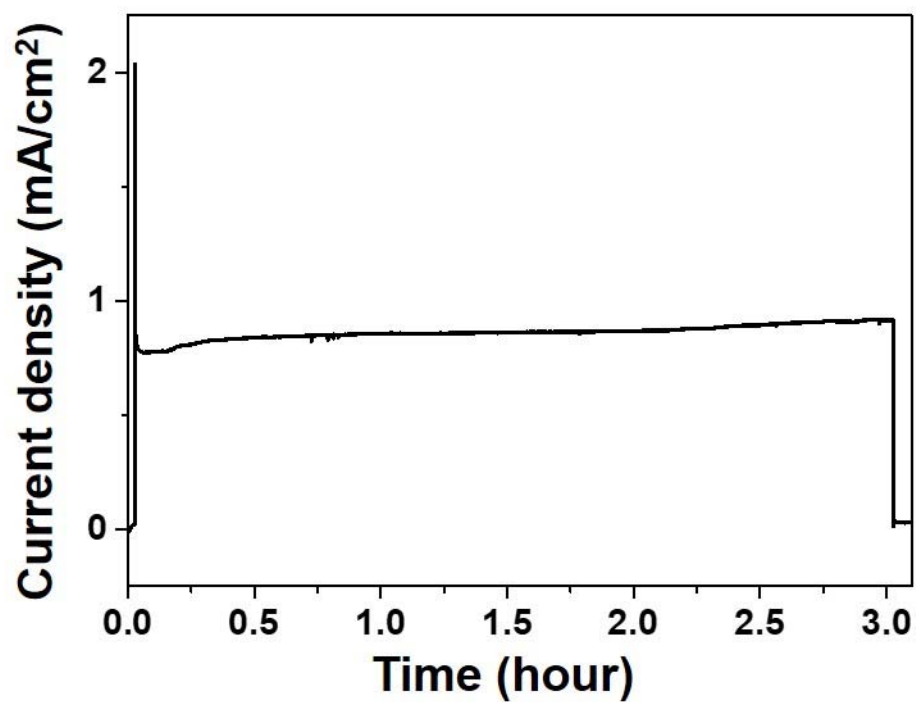

**Fig. S10** Current-time response curve of  $\text{Bi}_2\text{O}_3/\text{Bi}_2\text{S}_3(\text{Sono})$  electrode under UV-visible illumination in 0.4 V vs. RHE in a 0.1 M  $\text{Na}_2\text{SO}_3$  and 0.1 M  $\text{Na}_2\text{S}$  solution. Light intensity: 100  $\text{mW}/\text{cm}^2$ .

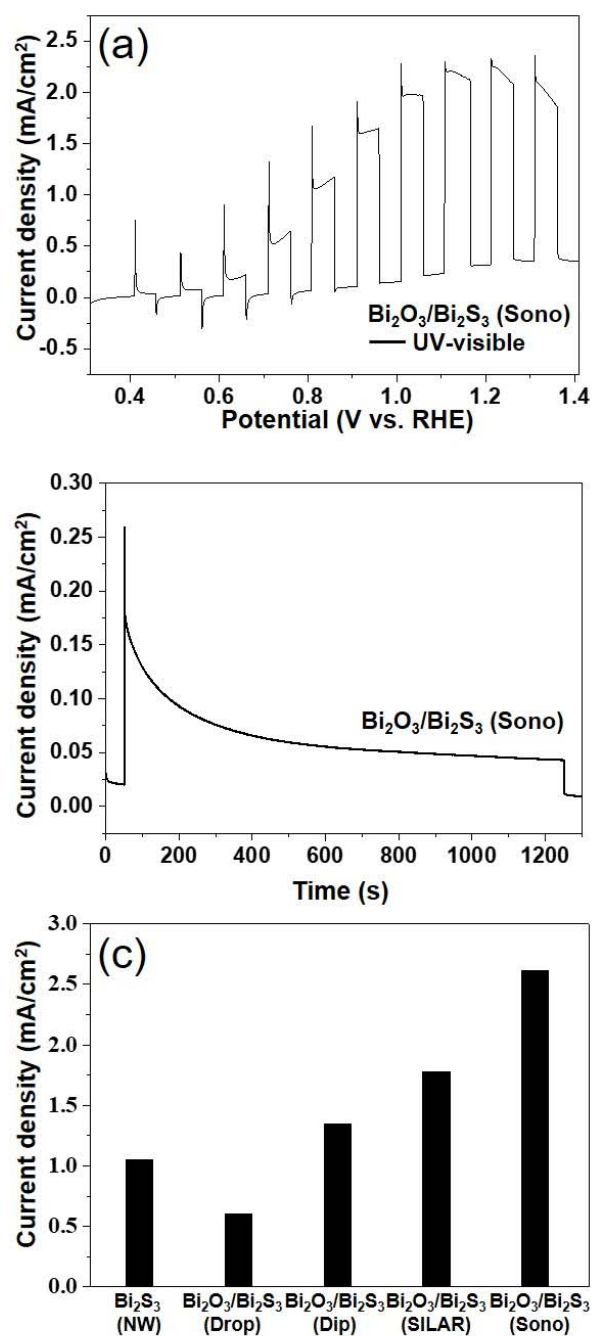

**Fig. S11** (a) LSV, and (b) Current-time response curve (0.1 V vs. Ag/AgCl) of  $\text{Bi}_2\text{O}_3/\text{Bi}_2\text{S}_3$ (Sono) composite under UV-visible illumination in a 0.1 M phosphate buffer (pH 7). Light intensity: 100 mW/cm<sup>2</sup>. (c) Photocurrent density of electrodes under UV-visible illumination at an applied potential of 1.2 V vs. RHE in a 0.1 M phosphate buffer (pH 7).

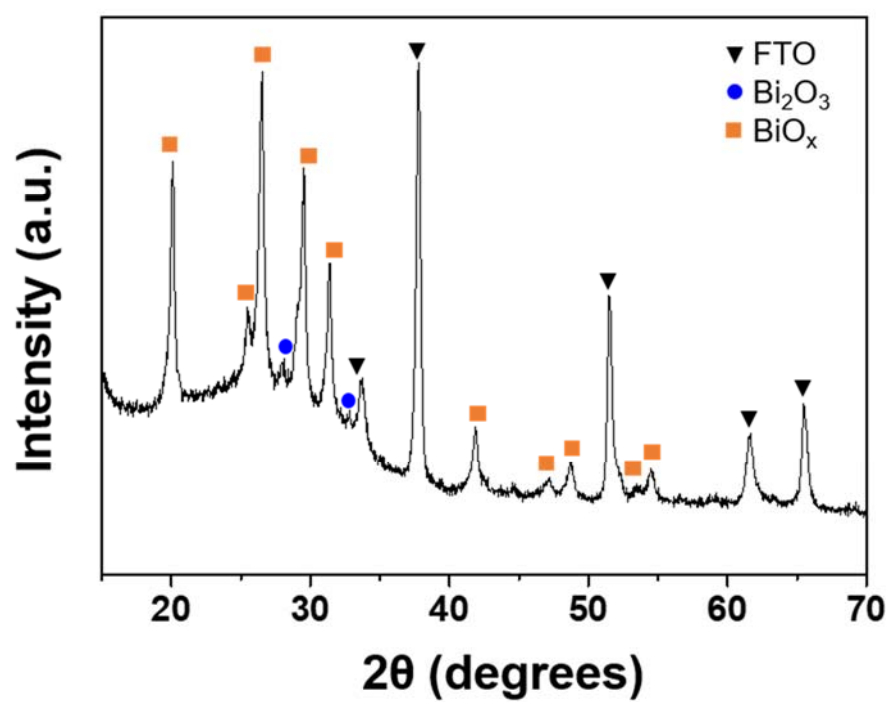

**Fig. S12** XRD patterns of  $\text{Bi}_2\text{O}_3/\text{Bi}_2\text{S}_3(\text{Sono})$  composite after water oxidation indicating that the decomposition of  $\text{Bi}_2\text{S}_3$  in the solution.

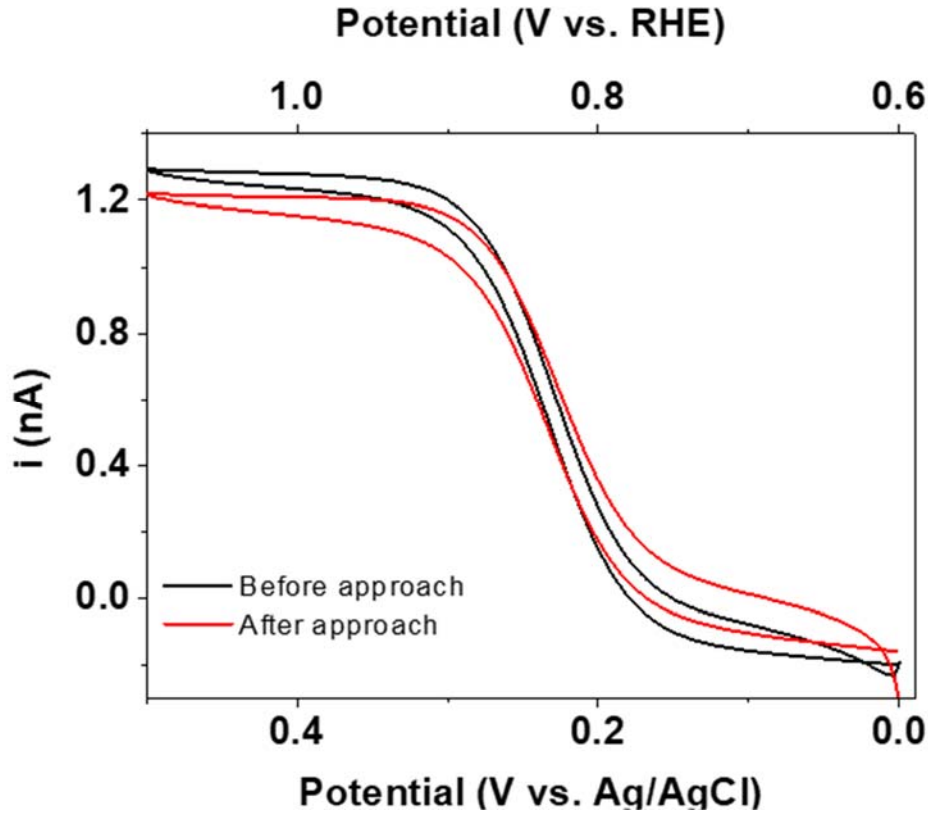

**Fig. S13** Cyclic voltammograms of Pt UME tip measured in 1 mM ferrocene methanol ( $D = 6.7 \times 10^{-6} \text{ cm}^2/\text{s}$ )/0.1 M  $\text{Na}_2\text{SO}_4$  solution before and after approach to the substrate. Assuming that  $\text{Bi}_2\text{O}_3/\text{Bi}_2\text{S}_3(\text{Sono})$  substrate is almost insulating at the open circuit under dark, the normalized current ( $I_T$ ) for the negative feedback  $\text{Bi}_2\text{O}_3/\text{Bi}_2\text{S}_3(\text{Sono})$  substrate can be defined as;[1]

$$I_T(L) = \frac{i_T}{i_{T,\infty}} = \left[ 0.292 + \frac{1.515}{(d/a)} + 0.6553 \exp(-2.4035/(d/a)) \right]^{-1}$$

where  $i_T$  and  $i_{T,\infty}$  are the steady-state tip current when the tip is close to the substrate, and far from the substrate, respectively, and  $d$  is distance from substrate. For cyclic voltammogram, the measured  $i_T$  and  $i_{T,\infty}$  were  $1.2 \times 10^{-9} \text{ A}$  and  $1.3 \times 10^{-9} \text{ A}$ , respectively. Consequently,  $d$  is obtained as  $15 \text{ }\mu\text{m}$  according to the above equation.

[1] A. J. Bard, L. R. Faulkner, John Wiley & Sons, Inc., (2001) 34.
